# Supplementary material for: Ozonation enhancement of low cost double-stranded DNA binding dye based fluorescence measurement of total bacterial load in water
Source: Royal Society of Chemistry journal article supplement (doi:10.1039/d0ra08742d), 2021-01-01
Supplement: d0ra08742d1.pdf [file d0ra08742d1.pdf]

## Supporting Information

### **Ozonation enhancement of low cost DNA binding dye based fluorescence measurement of total bacterial load in water**

*<sup>1</sup>Jiwon Choi, <sup>2,\*</sup>Beelee Chua, and <sup>1,\*\*</sup>Ahjeong Son*

<sup>1</sup>Department of Environmental Science and Engineering, Ewha Womans University, Seoul 03760,  
Republic of Korea

<sup>2</sup>School of Electrical Engineering, Korea University, Seoul 02841, Republic of Korea

\*Corresponding Author (B. Chua): 145 Anam-ro, Seongbuk-gu, Korea University, Seoul 02841,  
Republic of Korea; E-mail. [bchua@korea.ac.kr](mailto:bchua@korea.ac.kr), [chuabeelee@gmail.com](mailto:chuabeelee@gmail.com); Phone. +82 (2) 3290-4639

\*\*Corresponding Author (A. Son): 52 Ewhayeodae-gil, Seodaemun-gu, Ewha Womans University,  
Seoul 03760, Republic of Korea; E-mail. [ason@ewha.ac.kr](mailto:ason@ewha.ac.kr), [ahjeong.son@gmail.com](mailto:ahjeong.son@gmail.com); Phone. +82 (2)  
3277-3339; Fax. +82 (2) 3277-3275

## **Supporting Information**

### *Preparation of agar plates*

Bactor™ Agar (BD Biosciences, San Jose, CA, USA) for prepare agar plate to identify viable cell counts was carried out. Per manufacturer's recommendation, 15 g of LB broth and 7.5 g of Bactor Agar were dissolved in 500 mL of distilled water. Autoclave was performed under the same condition as LB media. After cooling at room temperature, solution was poured in petri dish (SPL Life Sciences, Gyeonggido, Korea).
